# Supplementary material for: Evolving Risk Classifications in AML in a Real-Life Scenario: After Changes upon Changes, Is It More and More Adverse?
Source: MDPI journal article supplement (doi:10.3390/cancers15051425), 2023-02-23
Supplement: s1 [file s1]

# Supplementary Materials: Evolving risk-classifications in AML in a real-life scenario: After changes upon changes, is it more and more adverse?

Clara Aparicio-Pérez, Esther Prados de la Torre, Joaquin Sanchez-Garcia, Carmen Martín-Calvo, Carmen Martínez-Losada, Javier Casaño-Sanchez, Juana Serrano-López and Josefina Serrano

## DNA Extraction

Nucleic acid isolation DNA from white blood cells was obtained in each center following previously established DNA isolation protocols. DNA quantification was assessed with Nanodrop (Thermo Fisher Scientific, Waltham, MA USA) and Qubit fluorometer (Thermo Fisher Scientific). DNA integrity was assessed with Bioanalyzer (Agilent Technologies, Santa Clara, CA, USA) or Tape Station 4100 (Agilent Technologies).

## Genes Regions Analyzed by Myeloid Solution Panel

ABL1 (4–9), ASXL1 (10,12,13), BRAF (15), CALR (9), CBL (8,9), CEBPA (all), CSF3R (all), DNMT3A (all), ETV6 (all), EZH2 (all), FLT3 (13–15,20), HRAS (2,3), IDH1 (4), IDH2 (4), JAK2 (all), KIT (2,8–11,13,17,18), KRAS (2,3), MPL (10), NPM1 (10,11), NRAS (2,3), PTPN11 (3,7–13), RUNX1 (all), SETBP1 (4), SF3B1 (10–16), SRSF2 (1), TET2 (all), TP53 (all), U2AF1 (2,6), WT1 (6–10), ZRSR2 (all).

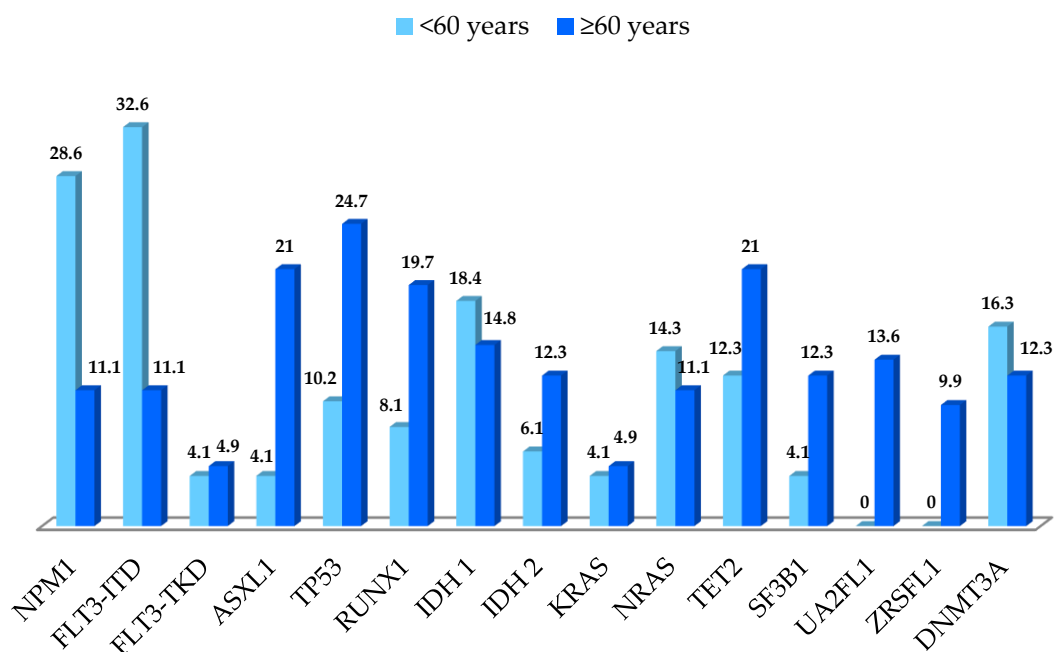

**Figure S1.** Frequency of NGS mutations in global cohort grouped by age.

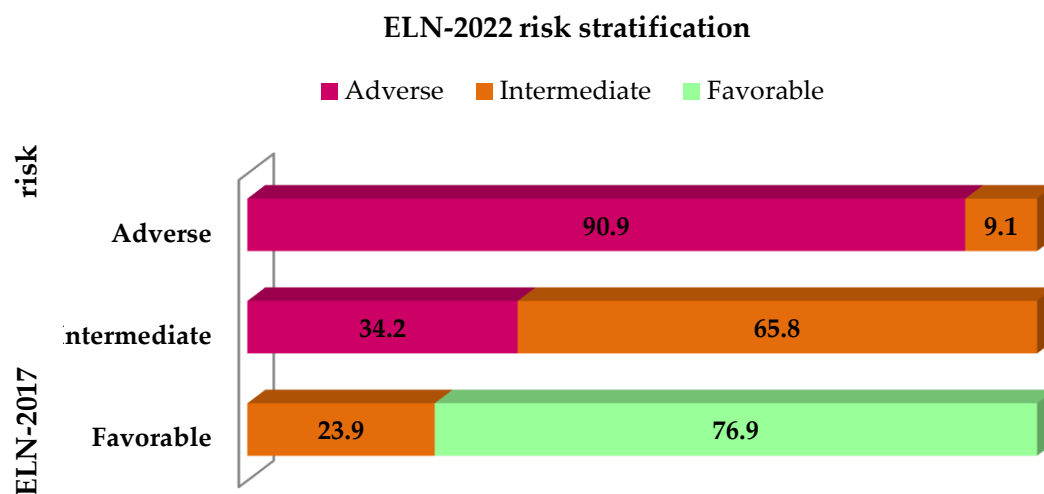

**Figure S2.** Bar plot representing the percentage of patients re-stratified according to ELN2022 in ELN2017 risk groups.

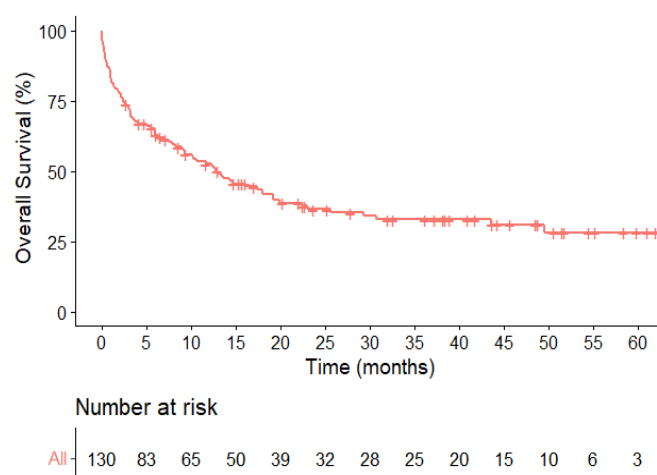

**Figure S3.** Overall Survival for the entire cohort (  $n = 130$  ).

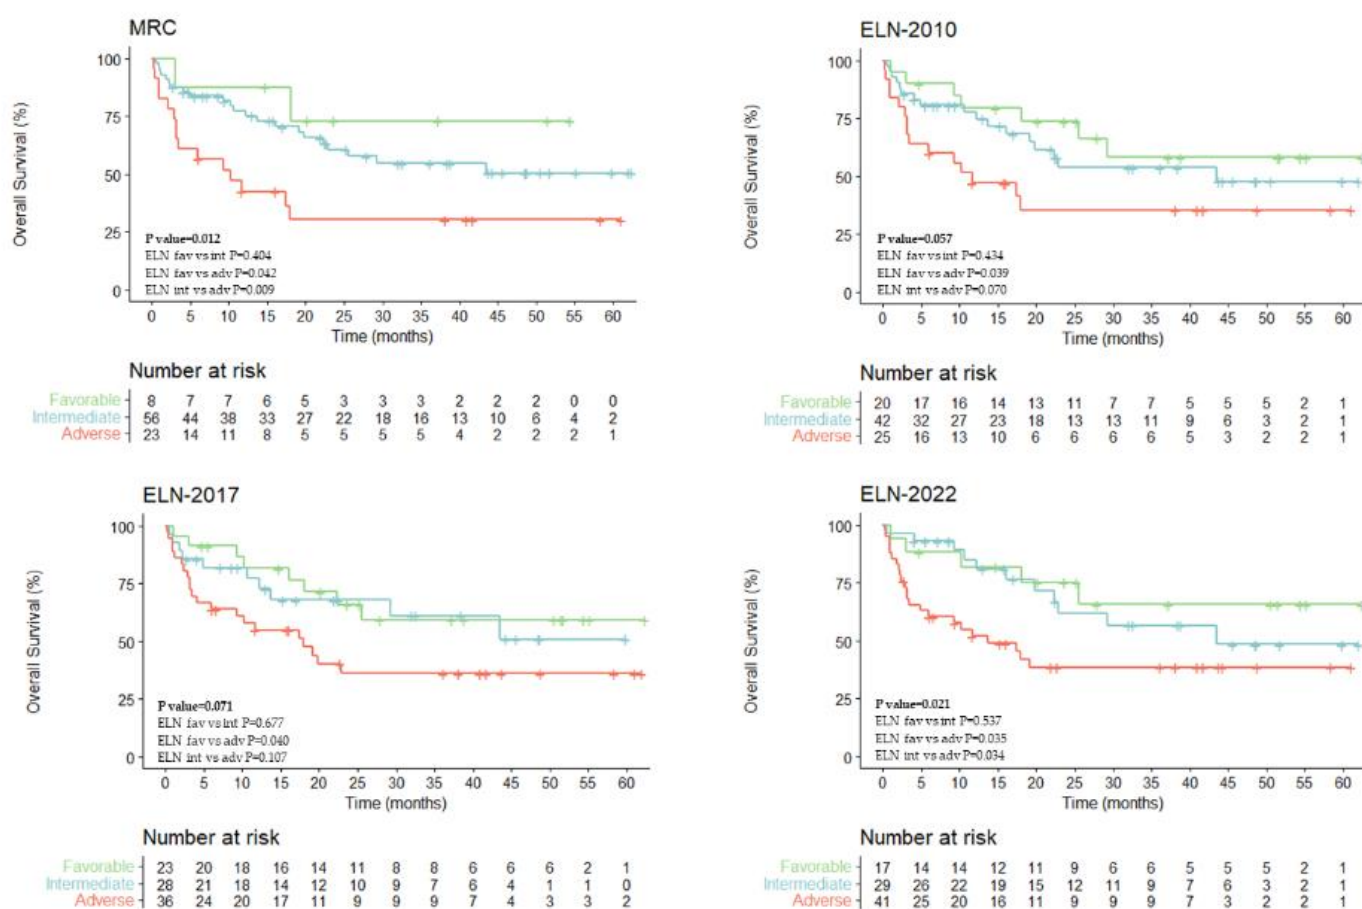

**Figure S4.** Overall Survival according to risk categories and classifications for the intensively treated patients (n = 87).

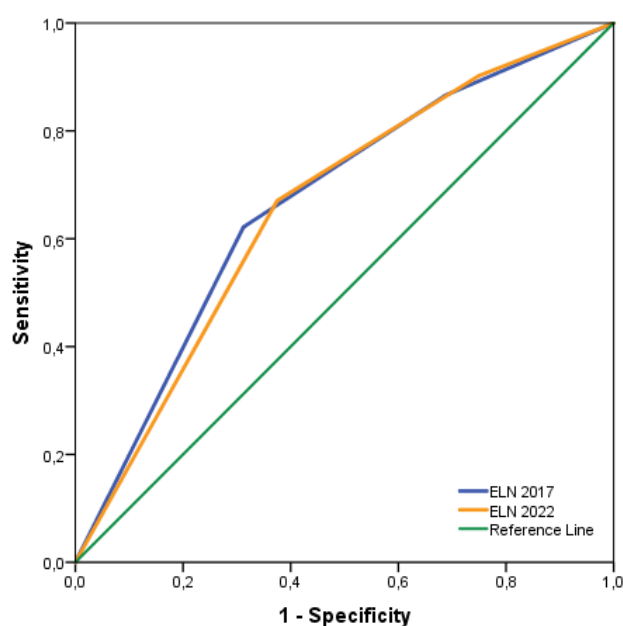

**Figure S5.** ROC curves for OS in global cohort by ELN2022 and ELN2017.

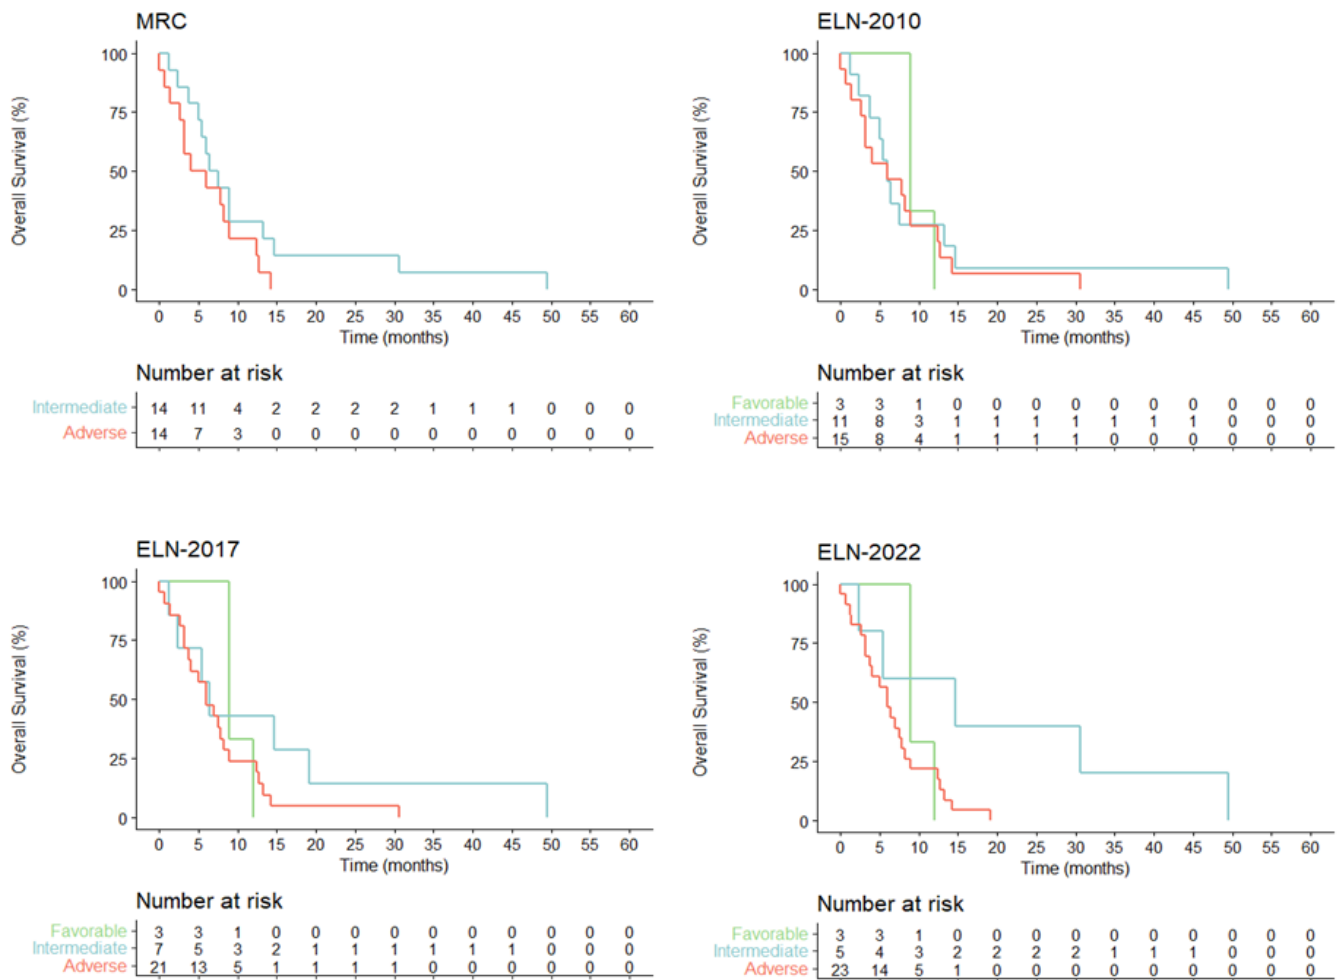

**Figure S6.** Overall Survival according to risk categories and classifications for patients receiving HSCT ( $n = 53$ ).

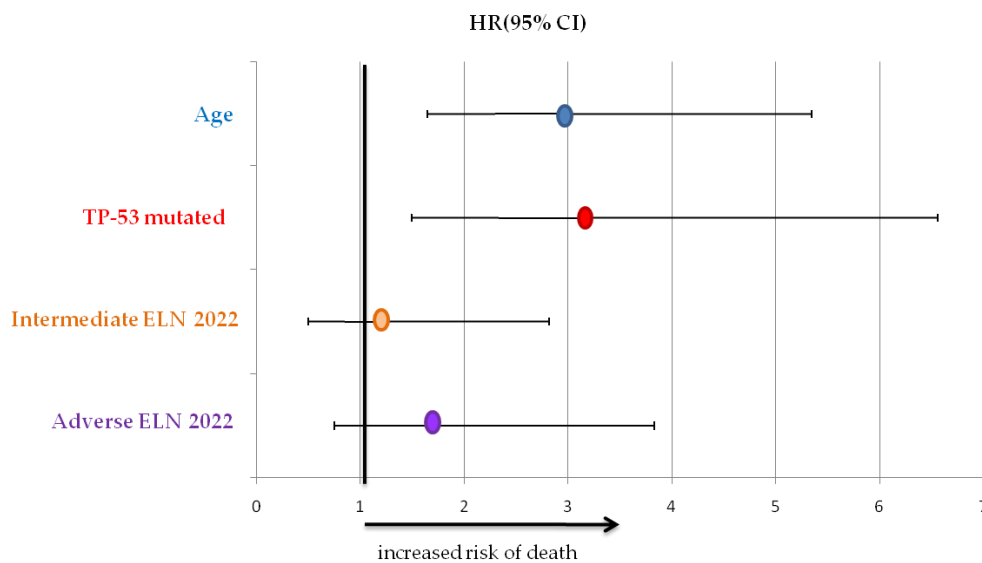

**Figure S7.** Overall Survival HRs obtained at multivariate analyses.

**Table S1.** Patient distribution of the entire cohort and according to ELN 2022 risk stratification with previous risk-classifications.

| <i>n</i> (%)                   | ELN 2022<br>Favorable<br>20 (15.4) | ELN 2022<br>Intermediate<br>37 (28.5) | ELN 2022<br>Adverse<br>73 (56.1) | <i>p</i> |
|--------------------------------|------------------------------------|---------------------------------------|----------------------------------|----------|
| MRC cytogenetic classification |                                    |                                       |                                  |          |
| MRC favorable                  | 8 (40)                             | 0                                     | 0                                | -        |
| MRC intermediate               | 12 (60)                            | 36 (100)                              | 27 (39.7)                        | -        |
| MRC adverse                    | 0                                  | 0                                     | 41 (60.3)                        | -        |
| Not classifiable               |                                    |                                       |                                  |          |
| ELN 2010 favorable             | 19 (95)                            | 4 (10.8)                              | 0                                | -        |
| ELN 2010 intermediate I/II     | 1 (5)                              | 31 (83.8)                             | 31 (42.5)                        | -        |
| ELN 2010 adverse               | 0                                  | 2 (5.4)                               | 42 (57.5)                        | -        |
| Not classifiable               |                                    |                                       |                                  |          |
| ELN 2017 favorable             | 20 (100)                           | 6 (16.2)                              | 0                                | -        |
| ELN 2017 intermediate          | 0                                  | 25 (67.6)                             | 13 (17.8)                        | -        |
| ELN 2017 adverse               | 0                                  | 6 (16.2)                              | 60 (82.2)                        | -        |

**Table S2.** Controversial mutational states according to ELN2010, ELN2017 and ELN2022 risk stratification.

| <i>n</i> | %    | ELN2010 Risk<br>Stratification | ELN2017 Risk<br>Stratification | ELN2022 Risk<br>Stratification | Molecular Characteristics                                                                                                                 |
|----------|------|--------------------------------|--------------------------------|--------------------------------|-------------------------------------------------------------------------------------------------------------------------------------------|
| 1        | 0.07 | Intermediate                   | Adverse                        | Adverse                        | Normal karyotype.<br>Mutated <i>FLT3</i> -ITD <sup>high ratio</sup> + <i>SF3B1</i>                                                        |
| 1        | 0.07 | Intermediate                   | Adverse                        | Adverse                        | Normal karyotype.<br>Mutated <i>FLT3</i> -ITD + <i>TP53</i>                                                                               |
| 1        | 0.07 | Intermediate                   | Favorable                      | Intermediate                   | Normal karyotype.<br>Mutated <i>NPM1/FLT3</i> -ITD <sup>high ratio</sup> + <i>SF3B1</i> + Biallelic mutated <i>CEBPA</i> no in frame bZIP |
| 1        | 0.07 | Adverse                        | Adverse                        | Adverse                        | Normal karyotype.<br>Mutated <i>FLT3</i> -ITD <sup>high ratio</sup> + <i>RUNX1</i>                                                        |
| 2        | 0.14 | Favorable                      | Favorable                      | Favorable                      | Normal karyotype.<br>Mutated <i>NPM1</i> + <i>SF3B1</i>                                                                                   |
| 1        | 0.07 | Favorable                      | Favorable                      | Favorable                      | Normal karyotype.<br><i>FLT3</i> -ITD <sup>low ratio</sup> + Biallelic mutated in frame bZIP <i>CEBPA</i>                                 |

**Table S3.** Overall Survival rate at 2 years and at 5 years and estimated mean and median of the intensively treated patients and detailed for each MRC cytogenetic, ELN2010, ELN 2017 and ELN 2022 risk group.

|                                | OS % (SE)                        | Estimated Mean (CI 95%) | Estimated Median (CI 95%) |
|--------------------------------|----------------------------------|-------------------------|---------------------------|
| Global cohort                  | 2y 53.6 (5.8)<br>5y 49.9 (6.3)   | 35.71 (29.6–41.72)      | 29.3 (NR)                 |
| MRC cytogenetic classification |                                  |                         |                           |
| MRC favorable                  | 2y 72.9 (16.5)<br>5y 72.9 (16.5) | 42.74 (28.63–56.81)     | Not reached               |
| MRC intermediate               | 2y 60.5 (7.3)<br>5y 50.4 (8.1)   | 38.99 (31.6–46.33)      | Not reached               |
| MRC adverse                    | 2y 30.3 (10.4)<br>5y 30.3 (10.4) | 23.09 (12–34.12)        | 10.6 (1.9–18.4)           |

| ELN2010 risk stratification |                |                     |                 |
|-----------------------------|----------------|---------------------|-----------------|
| ELN 2010 favorable          | 2y 73.7 (10.1) | 42.82 (31.36–54.28) | Not reached     |
|                             | 5y 58.1 (12.7) |                     |                 |
| ELN 2010 intermediate       | 2y 53.8 (8.9)  | 37.37 (28.7–45.9)   | 43.5 (NR)       |
|                             | 5y 47.8 (9.7)  |                     |                 |
| ELN 2010 adverse            | 2y 35.4 (10.5) | 25.96 (14.91–36.93) | 11.6 (0.4–22.8) |
|                             | 5y 35.4 (10.5) |                     |                 |
| ELN2017 risk stratification |                |                     |                 |
| ELN 2017 favorable          | 2y 66.0 (10.6) | 42.84 (32.1–53.56)  | Not reached     |
|                             | 5y 59.4 (11.4) |                     |                 |
| ELN 2017 intermediate       | 2y 67.9 (9.6)  | 38.98 (28.96–49)    | Not reached     |
|                             | 5y 50.9 (12.9) |                     |                 |
| ELN 2017 adverse            | 2y 36.1 (8.8)  | 27.82 (18.67–36.9)  | 18 (7.0–28.9)   |
|                             | 5y 36.1 (8.8)  |                     |                 |
| ELN2022 risk stratification |                |                     |                 |
| ELN 2022 favorable          | 2y 75.1 (10.9) | 45.53 (33.24–57.83) | Not reached     |
|                             | 5y 65.7 (12.9) |                     |                 |
| ELN 2022 intermediate       | 2y 61.8 (10.3) | 40.46 (31.0–49.9)   | 43.5 (NR)       |
|                             | 5y 48.5 (11.8) |                     |                 |
| ELN 2022 adverse            | 2y 38.4 (8.3)  | 27.5 (18.7–36.38)   | 13.6 (4.8–22.4) |
|                             | 5y 38.4 (8.3)  |                     |                 |

SE, Standard error; CI, confidence interval; y, years.

**Table S4.** Overall Survival rate at 2 years and at 5 years and estimated mean and median of the intensively treated patients and detailed for each MRC cytogenetic, ELN2010, ELN 2017 and ELN 2022 risk group.

|                                | OS %(SE)       | Estimated Mean (CI 95%) | Estimated Median (CI 95%) |
|--------------------------------|----------------|-------------------------|---------------------------|
| Global cohort                  | 2y 53.6 (5.8)  | 35.71 (29.6–41.72)      | 29.3 (NR)                 |
|                                | 5y 49.9 (6.3)  |                         |                           |
| MRC cytogenetic classification |                |                         |                           |
| MRC favorable                  | 2y 72.9 (16.5) | 42.74 (28.63–56.81)     | Not reached               |
|                                | 5y 72.9 (16.5) |                         |                           |
| MRC intermediate               | 2y 60.5 (7.3)  | 38.99 (31.6–46.33)      | Not reached               |
|                                | 5y 50.4 (8.1)  |                         |                           |
| MRC adverse                    | 2y 30.3 (10.4) | 23.09 (12–34.12)        | 10.6 (1.9–18.4)           |
|                                | 2y 30.3 (10.4) |                         |                           |
| ELN2010 risk stratification    |                |                         |                           |
| ELN 2010 favorable             | 2y 73.7 (10.1) | 42.82 (31.36–54.28)     | Not reached               |
|                                | 5y 58.1 (12.7) |                         |                           |
| ELN 2010 intermediate          | 2y 53.8 (8.9)  | 37.37 (28.7–45.9)       | 43.5 (NR)                 |
|                                | 5y 47.8 (9.7)  |                         |                           |
| ELN 2010 adverse               | 2y 35.4 (10.5) | 25.96 (14.91–36.93)     | 11.6 (0.4–22.8)           |
|                                | 5y 35.4 (10.5) |                         |                           |
| ELN2017 risk stratification    |                |                         |                           |
| ELN 2017 favorable             | 2y 66.0 (10.6) | 42.84 (32.1–53.56)      | Not reached               |
|                                | 5y 59.4 (11.4) |                         |                           |
| ELN 2017 intermediate          | 2y 67.9 (9.6)  | 38.98 (28.96–49)        | Not reached               |
|                                | 5y 50.9 (12.9) |                         |                           |
| ELN 2017 adverse               | 2y 36.1 (8.8)  | 27.82 (18.67–36.9)      | 18 (7.0–28.9)             |
|                                | 5y 36.1 (8.8)  |                         |                           |
| ELN2022 risk stratification    |                |                         |                           |
| ELN 2022 favorable             | 2y 75.1 (10.9) | 45.53 (33.24–57.83)     | Not reached               |
|                                | 5y 65.7 (12.9) |                         |                           |
| ELN 2022 intermediate          | 2y 61.8 (10.3) | 40.46 (31.0–49.9)       | 43.5 (NR)                 |
|                                | 5y 48.5 (11.8) |                         |                           |

|                  |                                       |                   |                 |
|------------------|---------------------------------------|-------------------|-----------------|
| ELN 2022 adverse | <u>2y 38.4 (8.3)</u><br>5y 38.4 (8.3) | 27.5 (18.7–36.38) | 13.6 (4.8–22.4) |
|------------------|---------------------------------------|-------------------|-----------------|

SE, Standard error; CI, confidence interval; y, years.
